# Supplementary material for: Immune Profile Of Uveal Melanoma Patients: Impact On Clinical Outcome
Source: Research Square preprint supplement (doi:10.21203/rs.3.rs-614744/v1), 2021-07-07
Supplement: Supplementary file 1 [file a27a25ff4bd48433bbd97e60.docx]

**Supplementary table.** Mean (SD) and median (IQR) of circulating factors for total sample and by patients’ survival

|  | Patients’ Survival | | |  |
| --- | --- | --- | --- | --- |
|  | Tot (12) | ≥ 6 months (7) | < 6 months (5) | p-value |
| BTLA |  |  |  |  |
| Mean (SD) | 1556,42 (1372,6) | 1219,71 (1124,67) | 2027,82 (1675,69) |  |
| Median  IQR | 1400,51  488 - 2250,665 | 1592,02  56 - 2466,46 | 1209  1094 – 2034,87 | 0,569 |
| CD137 |  |  |  |  |
| Mean (SD) | 123,18 (196,11) | 68,72 (55,71) | 199,41 (297,75) |  |
| Median  IQR | 97,1  7 – 124,93 | 76  7 – 118,2 | 118,2  7 - 144,86 | 0,560 |
| CD27 |  |  |  |  |
| Mean (SD) | 5077,65 (3542,98) | 4931,92 (3278,82) | 5281,69 (4278,42) |  |
| Median  IQR | 4778,76  2433,5 – 6334,31 | 4805,1  2055,28 – 7065,62 | 3814  2631 – 5049,2 | 0,935 |
| CD28 |  |  |  |  |
| Mean (SD) | 500,05 (436,40) | 549,61 (373,31) | 430,67 (551,71) |  |
| Median  IQR | 299,47  175,5 – 889,58 | 475,04  205 – 978,15 | 209  146 - 246 | 0,464 |
| CD80 |  |  |  |  |
| Mean (SD) | 670,41 (607,78) | 612,68 (479,51) | 751,22 (810,52) |  |
| Median  IQR | 499,35  133 – 1154,37 | 622,7  96 – 979,35 | 243  170 – 1636,55 | 0,807 |
| CTLA4 |  |  |  |  |
| Mean (SD) | 225,28 (150,55) | 234,21 (160,30) | 212,76 (153,13) |  |
| Median  IQR | 195,35  112 – 368,13 | 215,7  123 – 401,52 | 175  101 – 298,26 | 0,745 |
| GITR |  |  |  |  |
| Mean (SD) | 33,73 (38,92) | 37,75 (50,31) | 28,11 (17,38) |  |
| Median  IQR | 12  11,5 – 45,77 | 12  11 - 63 | 26  12 - 42 | 0,739 |
| HVEM |  |  |  |  |
| Mean (SD) | 49,98 (87,07) | 16,43 (17,17) | 96,95 (125,22) |  |
| Median  IQR | 9  6 - 47 | 6  6 - 35 | 47  9 – 111,75 | **0,045** |
| IDO |  |  |  |  |
| Mean (SD) | 38,45 (34,58) | 49,92 (36,97) | 22,39 (26,17) |  |
| Median  IQR | 31,02  13 – 55,8 | 49,05  20 - 56 | 13  13 - 17 | 0,167 |
| IDO ratio |  |  |  |  |
| Mean (SD) | 0,028 (0,013) | 0,021 (0,007) | 0,037 (0,014) |  |
| Median  IQR | 0,024  0,018 – 0,038 | 0,019  0,017 – 0,024 | 0,038  0,024 – 0,043 | **0,035** |
| LAG3 |  |  |  |  |
| Mean (SD) | 276,38 (159,38) | 281,09 (199,17) | 269,78 (101,29) |  |
| Median  IQR | 253,16  141,5 – 376,59 | 312,31  172 - 336 | 194  101 – 486,52 | 0,871 |
| PD1 |  |  |  |  |
| Mean (SD) | 77,13 (68,21) | 90,28 (64,93) | 58,73 (64,93) |  |
| Median  IQR | 81,61  10 – 119,16 | 108,56  11 – 119,16 | 27  9 – 103,22 | 0,464 |
| PDL1 |  |  |  |  |
| Mean (SD) | 13,32 (16,48) | 18,12 (20,26) | 6,6 (5,81) |  |
| Median  IQR | 4,5  2 - 24 | 4  2 - 35 | 5  2 - 8 | 0,674 |
| PDL2 |  |  |  |  |
| Mean (SD) | 5671,02 (4235,47 | 6556,42 (4177,24) | 4431,45 (4457,16) |  |
| Median  IQR | 5639,71  1418 – 9436,41 | 7673,19  1043 - 9785 | 2550  1418 – 4746,06 | 0,684 |
| TIM3 |  |  |  |  |
| Mean (SD) | 3223,78 (2887,20) | 2689,74 (2104,38) | 3971,44 (3883,73) |  |
| Median  IQR | 2502  980,5 – 4955,68 | 3052  773,16 – 3746,79 | 1952  1108 – 6164,57 | 0,570 |
| E-selectina |  |  |  |  |
| Mean (SD) | 177163,4 (150450) | 195553,3 (157782,1) | 151417,5 (153243,8) |  |
| Median  IQR | 150736,8  36994,78 – 314736,3 | 243180,4  28748,26 – 334167,4 | 46740,86  45060,43 – 295335,3 | 0,935 |
| P-selectina |  |  |  |  |
| Mean (SD) | 3234875 (3921658) | 4406432 (4660213) | 1594696 (1988038) |  |
| Median  IQR | 1333011  151359,6 - 6861150 | 2277900  156666,2 - 9324800 | 358156,9  146053 - 3005400 | 0,368 |
| GMCSF |  |  |  |  |
| Mean (SD) | 20 (13,58) | 21,86 (13,90) | 17,4 (14,24) |  |
| Median  IQR | 20  7 - 33 | 33  7 - 33 | 7  7 - 33 | 0,575 |
| IcamI |  |  |  |  |
| Mean (SD) | 145303,7 (166541,3) | 146528,7 (186024) | 143588,6 (156078) |  |
| Median  IQR | 97523,9  336 - 272986,6 | 74415,49  336 - 310854,6 | 120632,3  336 - 235118,5 | 0,933 |
| IFN alpha |  |  |  |  |
| Mean (SD) | 38,37 (53,79) | 53,53 (66,03) | 17,14 (21,24) |  |
| Median  IQR | 17,30  0 – 66,79 | 25,93  0 – 92,63 | 11,69  0 – 22,91 | 0,449 |
| IFN gamma |  |  |  |  |
| Mean (SD) | 226,32 (220,22) | 277,55 (250,11) | 154,59 (168,84) |  |
| Median  IQR | 163,85  29,11 – 396,46 | 330,88  26,12 – 543,04 | 46,46  40,17 – 281,24 | 0,465 |
| IL1alpha |  |  |  |  |
| Mean (SD) | 248,61 (696,80) | 411,66 (903,01) | 20,34 (20,50) |  |
| Median  IQR | 13,44  1,33 – 51,02 | 8,84  1,04 – 384,81 | 18,04  3,29 – 27,83 | 0,935 |
| IL1beta |  |  |  |  |
| Mean (SD) | 39,49 (67,20) | 56,32 (84,57) | 15,94 (22,36) |  |
| Median  IQR | 13,86  1 – 50,55 | 45,87  1 – 55,21 | 1  1 – 26,71 | 0,238 |
| IL10 |  |  |  |  |
| Mean (SD) | 9 (8,36) | 10,14 (8,55) | 7,4 (8,76) |  |
| Median  IQR | 9  1 - 17 | 17  1 - 17 | 1  1 - 17 | 0,575 |
| IL12p70 |  |  |  |  |
| Mean (SD) | 252,76 (133,28) | 283,26 (155,25) | 210,06 (93,73) |  |
| Median  IQR | 209,22  136,34 – 352,95 | 279,68  134,26 – 377,95 | 185,93  138,42 – 232,51 | 0,570 |
| IL13 |  |  |  |  |
| Mean (SD) | 16,69 (21,73) |  | 14,33 (14,31) |  |
| Median  IQR | 9,18  5,0 – 16,90 | 7,95  5,0 - 20 | 10,40  7,95 – 13,81 | 0,807 |
| IL17A |  |  |  |  |
| Mean (SD) | 136,16 (139,66) | 166,41 (153,93) | 93,80 (119,38) |  |
| Median  IQR | 68,75  14,42 – 299,13 | 184,89  13,45 – 316,71 | 36,20  33,34 – 101,29 | 0,515 |
| IL4 |  |  |  |  |
| Mean (SD) | 195,13 (252,81 | 265,39 (316,70) | 96,76 (67,67) |  |
| Median  IQR | 97,47  36,71 – 258,02 | 199,5  36,71 – 330,3 | 77,94  72,74 - 117 | 0,415 |
| IL6 |  |  |  |  |
| Mean (SD) | 26,19 (29,13) | 33,17 (32,17) | 16,4 (24,0) |  |
| Median  IQR | 12,5  4 - 40 | 34  4 - 46 | 4  4 - 11 | 0,273 |
| IL8 |  |  |  |  |
| Mean (SD) | 164,31 (313,39) | 32,28 (53,04) | 349,14 (438,93) |  |
| Median  IQR | 28,18  4,35 – 216,98 | 7  2,70 – 57,15 | 289,92  48,30 – 314,38 | 0,168 |
| IP10 |  |  |  |  |
| Mean (SD) | 165,54 (160,30) | 137,79 (92,95) | 204,39 (233,39) |  |
| Median  IQR | 115,56  77,05 – 214,45 | 123,08  35,73 – 217,39 | 108,03  97,29 – 141,45 | 0,935 |
| MCP1 |  |  |  |  |
| Mean (SD) | 1259,05 (1674,25 | 925,95 (751,69) | 1725,37 (2528,83) |  |
| Median  IQR | 613,34  215,92 – 1671,05 | 687,19  248,82 – 1360,24 | 226,18  205,67 – 1981,85 | 0,808 |
| MIP1alpha |  |  |  |  |
| Mean (SD) | 97,85 (140,85) | 140,0 (175,12) | 38,83 (34,25) |  |
| Median  IQR | 46,50  14,74 - 104 | 75,69  13,84 – 221,46 | 27,86  15,65 – 47,58 | 0,372 |
| MIP1beta |  |  |  |  |
| Mean (SD) | 1069,44 (1741,73) | 1644,14 (2137,67) | 264,86 (317,50) |  |
| Median  IQR | 344,84  31,24 – 1326,03 | 1133,68  20,32 – 2809,37 | 37,89  34,50 – 584,02 | 0,372 |
| TNFalpha |  |  |  |  |
| Mean (SD) | 1255,89 (1274,64) | 1514,85 (1444,87) | 893,34 (1027,05) |  |
| Median  IQR | 761,72  110,76 – 2501,34 | 1328,8  108,95 – 2995,34 | 194,65  175,24 – 1763,2 | 0,570 |
| Median  IQR | 761,72  110,76 – 2501,34 | 1328,8  108,95 – 2995,34 | 194,65  175,24 – 1763,2 | 0,570 |
